Title : PHARMACOKINETICS OF PROPOFOL ADMINISTERED BY PROLONGED CONTINUOUS INTRAVENOUS INFUSION IN MAN.

Authors : J. Albanèse, M.D.\*, J.P. Auffray, M.D.\*, B. Lacarelle, M.D.\*\*, C. Martin, M.D.\*, F. Guoin, M.D.\*

Affiliation :\* Département d'Anesthésie-Réanimation - Hôpital Sainte-Marguerite - 13009 MARSEILLE - France.

\*\* Laboratoire de Pharmacologie - Faculté de Pharmacie - 13005 MARSEILLE - France.

**Introduction.** Patients in intensive care unit and under prolonged controlled mechanical ventilation may require a sedation. Rapid reversibility of the sedation may be needed to assess neurological status of patients. Thus it is valuable to use a drug whose distribution and metabolism result in a short plasma half-life. Propofol is a short acting hypnotic drug whose pharmacokinetics make it suitable for use by continuous intravenous administration.

**Patients and methods.** After institutional approval, this study included 6 patients, 4 males, 2 females with a mean age of  $50 \pm 23$  years (mean  $\pm$  SD). These patients were free from previous hepatic disease and were under controlled mechanical ventilation for neurologic disease in 4 cases (2 post-ischemic brain damages, 1 head trauma, 1 meningo-encephalitis) and for acute respiratory insufficiency in 2 cases. They received a  $FiO_2$  between 0.3 and 0.5 and tidal volume and respiratory rate were adjusted to maintain blood gas levels within normal range. Propofol was first given as a bolus induction dose of 1 to 3 mg/kg intravenously within 1 min. Then propofol was given at a constant flow rate at a dose of 3 mg/kg/h for 3 days through a central venous line. Blood samples were taken from a radial artery catheter inserted in the non-dominant arm. Samples were obtained before and 1 min. after the bolus injection and then 1 min., 10 min., 20 min., 40 min., 60 min., 2 h, 4h, 6h and every 12 h during infusion. After the infusion was stopped, arterial blood samples were obtained 5 min., 10 min., 40 min., 1h, 2h, 4h, 6h, 12h and every 12h until the 5th day. Samples were placed in tubes containing potassium oxalate, mixed thoroughly and then stored at 4°C before analysis. Whole blood propofol concentrations were measured following extraction into cyclohexane by a high pressure liquid chromatographic method using fluorescence detection. For all patients, elimination half-life was calculated by the classical least square method and clearance was assessed according to the relationship :  $Cl = Dose/AUC$ . In 4 patients, plasma concentrations were fitted to bi and tri compartmental model and individual parameters were estimated using the maximum likelihood estimation procedure (APIS program).

**Results.** Propofol concentrations plotted against time are given in figure 1. After bolus injection there was a decrease in concentration and the minimum level ( $1174 \pm 522$  ng/ml) was reached at the 4th hour. A steady state was obtained at the 18th hour, the maximum level being  $2009 \pm 835$  ng/ml. After the infusion was stopped, there was a secondary peak in the drug concentration between the 1st and 2nd hour and then concentrations declined in a curvilinear manner. Kinetic analysis was performed using bi or tricompartmental model. Results are given in table 1.

**Discussion.** When propofol is administered by prolonged continuous intravenous infusion, pharmacokinetic parameters are not similar to those observed after single bolus dose, or short term infusion

(1, 2) : plasma elimination half-life and  $V_d$  area are dramatically increased and only total body clearance is unchanged. This might be explained by a storage in a poorly perfused deep compartment (probably fat) with a slow return of propofol into blood.

#### References.

1. Cockshott ID : Propofol pharmacokinetics and metabolism - an overview. Postgrad. Med. J. 61, (suppl. 3) : 45-50, 1985.
2. Gepts E., Claeys A.M., Camu F. : Pharmacokinetics of propofol administered by continuous intravenous infusion in man. A preliminary report. Postgrad. Med. J. 61, (suppl. 3) : 51-52, 1985.

| Trialist                      | Present study  | GEPTS and al. (2) | COCKSHOTT (1) |
|-------------------------------|----------------|-------------------|---------------|
| T 1/2 (h)                     | $28,4 \pm 11$  | $3,7 \pm 0,3$     | $6,4 - 8,3$   |
| $V_d$ area (l)                | $1632 \pm 670$ | $1517,19 \pm 139$ | $387 - 1587$  |
| $Cl_{tot} (l \cdot min^{-1})$ | $1,8 \pm 0,84$ | $1,6 \pm 0,85$    | $1,91 - 2,21$ |
| $V_i$ (l)                     | $37 \pm 15$    | -                 | $22 - 67$     |

$V_i$  = volume of central compartment ;  $V_d$  area = apparent volume of distribution ;  $Cl_{tot}$  : total body clearance ; T1/2 = terminal elimination half-life.

TABLE 1 :  
Pharmacokinetics of propofol

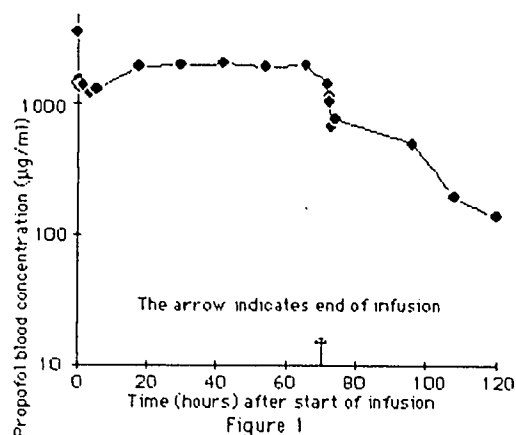

Figure 1
